# Supplementary material for: Nanopore Direct RNA Sequencing Reveals the Short-Term Salt Stress Response in Maize Roots
Source: MDPI journal article supplement (doi:10.3390/plants13030405), 2024-01-30
Supplement: s1 [file s1]

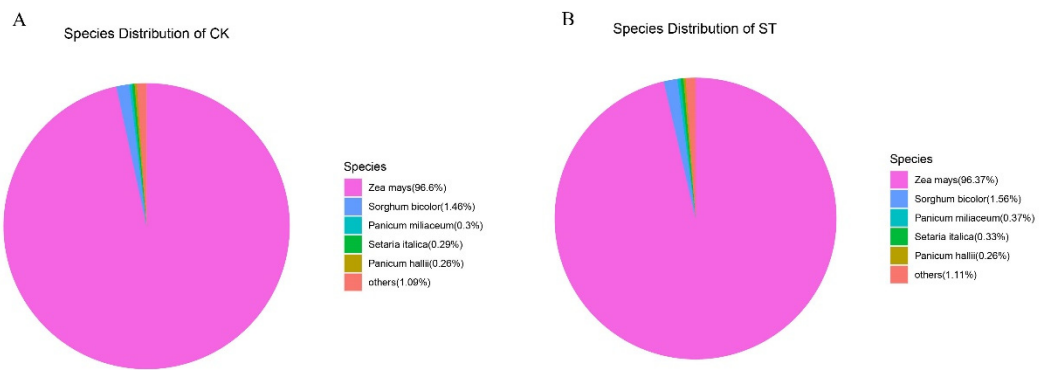

Supplementary Figure S1: Species taxonomy plot of NR annotation

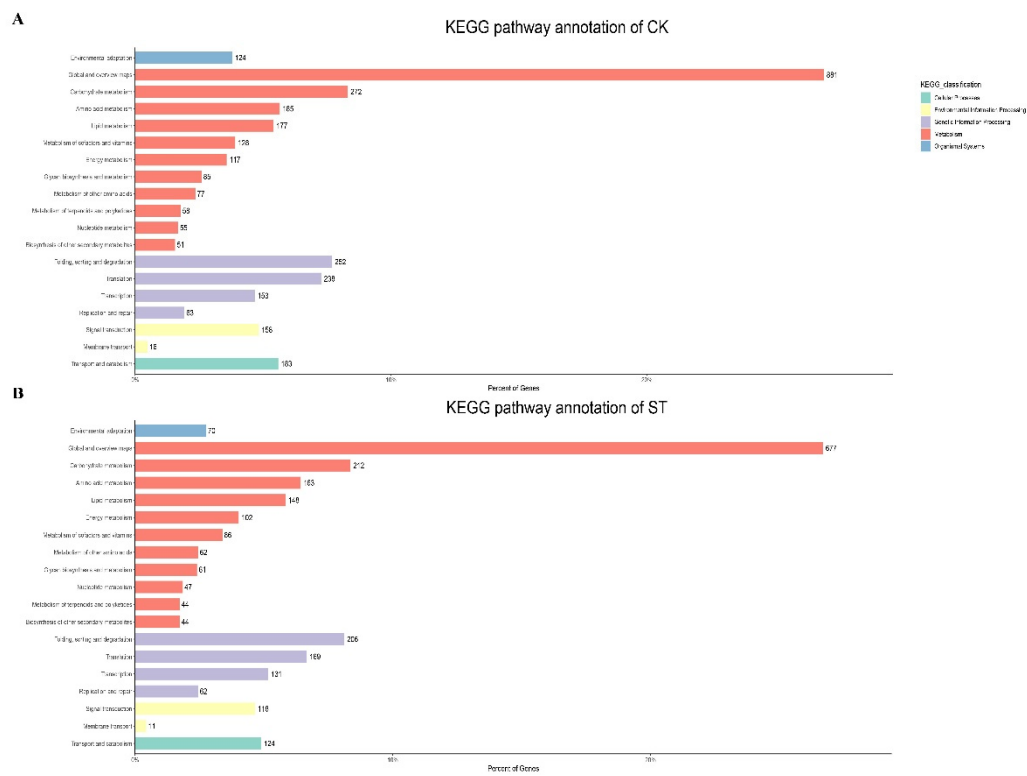

Supplementary Figure S2: KEGG annotation statistics for CK and ST transcripts

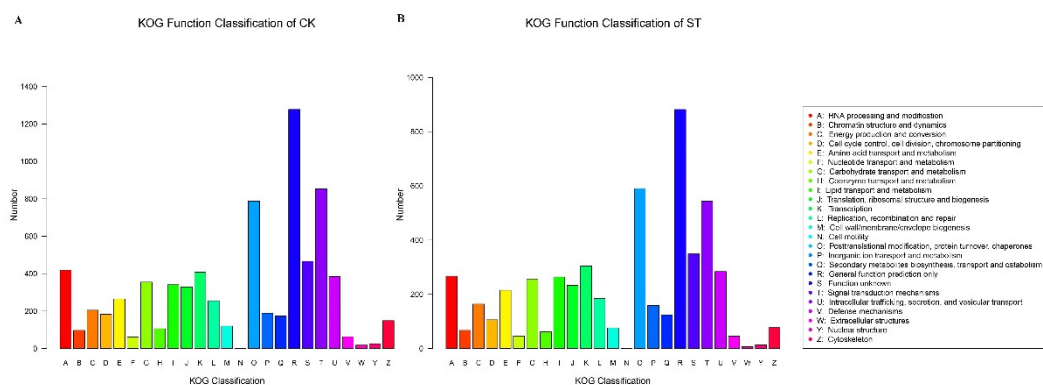

Supplementary Figure S3: KOG annotation statistics for CK and ST transcripts

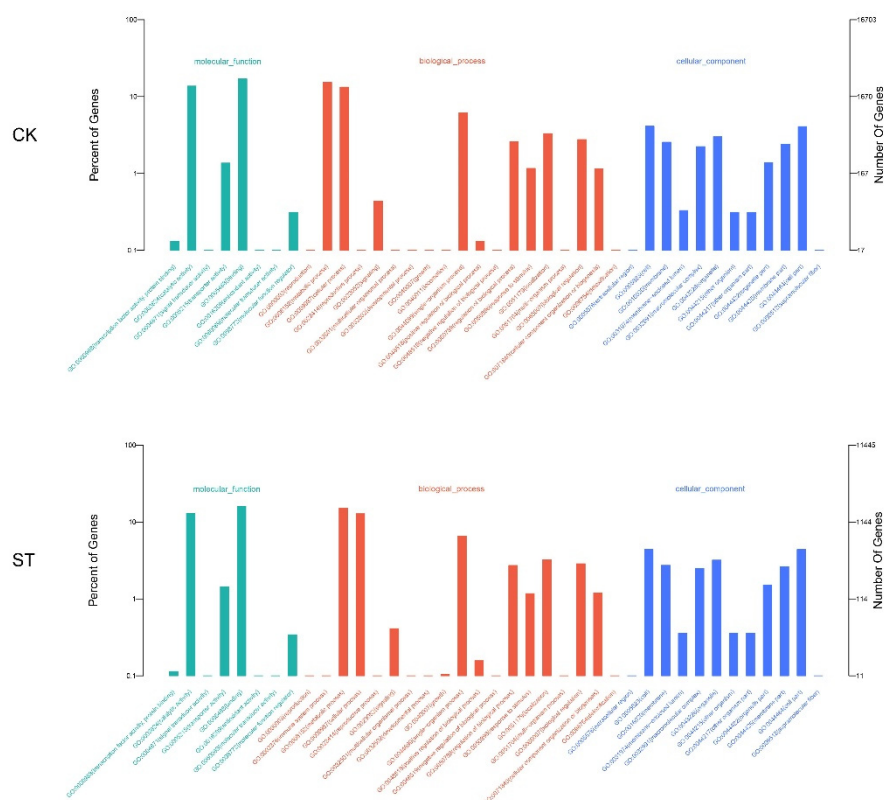

Supplementary Figure S4: GO annotation statistics for CK and ST transcripts

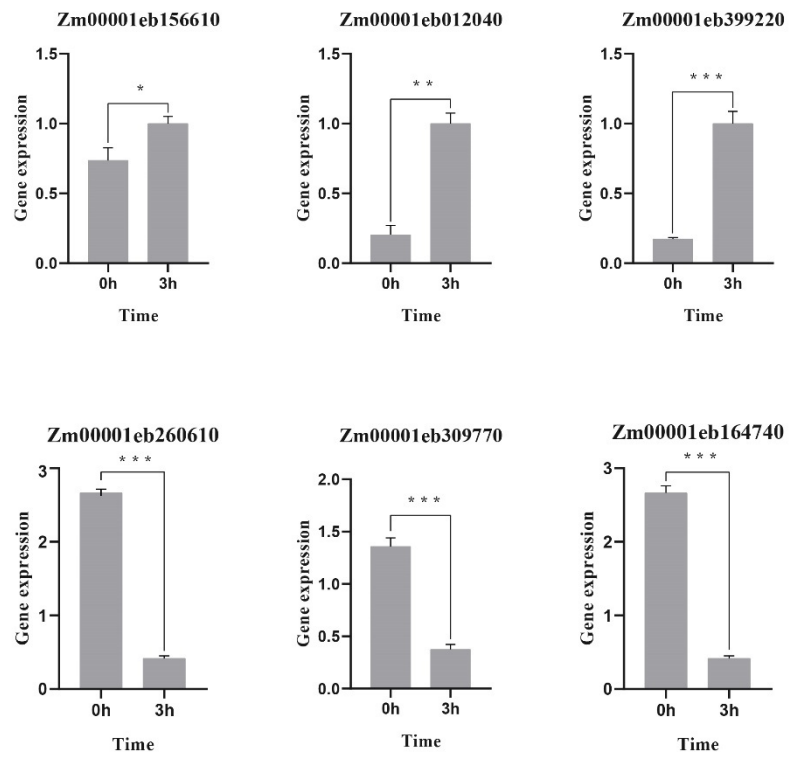

Supplementary Figure S5: The qRT-PCR results figure. “ \* ” indicates  $P < 0.05$ , “ \*\* ” indicates  $P < 0.01$ , and “ \*\*\* ” indicates  $P < 0.001$ .
